# Supplementary material for: The flow field of the upper hypoxic eastern tropical North Atlantic oxygen minimum zone
Source: Copernicus journal article supplement (doi:10.5194/os-12-153-2016), 2016-01-18
Supplement: Supplementary file 1 [file os-12-153-2016-supplement.zip]

Archive with 3 entries (3 files):
- Stramma_etal_suppl.pdf
- ssh_float_atl.mp4
- os-12-153-2016-supplement-title-page.pdf
