# Supplementary material for: The flow field of the upper hypoxic eastern tropical North Atlantic oxygen minimum zone
Source: Copernicus journal article supplement (doi:10.5194/os-12-153-2016), 2016-01-18
Supplement: Supplementary file 1 [file os-12-153-2016-supplement.zip › os-12-153-2016-supplement-title-page.pdf]

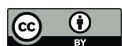

## *Supplement of*

# **The flow field of the upper hypoxic eastern tropical North Atlantic oxygen minimum zone**

**L. Stramma et al.**

*Correspondence to:* L. Stramma (lstramma@geomar.de)

- [os-12-153-2016-supplement-title-page.pdf](#)
- [Stramma\\_et\\_al\\_suppl.pdf](#)
- [ssh\\_float\\_atl.mp4](#)

The copyright of individual parts of the supplement might differ from the CC-BY 3.0 licence.
